# Supplementary material
Source: Springer Nature journal article supplement (https://www.springermedizin.de/resource/supplementary/12885_2013_4334_MOESM1_ESM.pdf/9466022)
Supplement: MOESM1 [file 9466022]

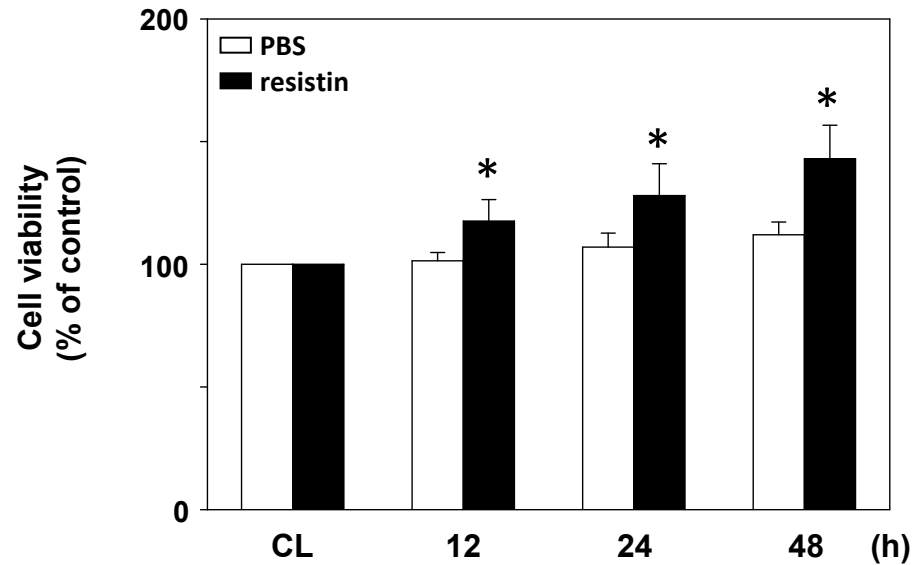

**Effect of resistin on cell viability of SK-Hep1.** (A) Cells were kept as controls (CL) or stimulated with resistin at the indicated time periods. Cell viability was assayed by the MTT test. Bar graphs represent folds of CL cells, mean  $\pm$  standard error of the mean (SEM). \* $P < 0.05$  versus CL.
